# Supplementary material for: Synthesis, structural investigations and corrosion inhibition studies on Mn(ii), Co(ii), Ni(ii), Cu(ii) and Zn(ii) complexes with 2-amino-benzoic acid (phenyl-pyridin-2-yl-methylene)-hydrazide
Source: Royal Society of Chemistry journal article supplement (doi:10.1039/c4ra11929k), 2015-01-01
Supplement: c4ra11929k1.pdf [file c4ra11929k1.pdf]

*Electronic Supplementary Information (ESI)*

**Synthesis, structural investigations and corrosion inhibition studies on Mn(II), Co(II), Ni(II), Cu(II) and Zn(II) complexes with 2-amino-benzoic acid (phenyl-pyridin-2-yl-methylene)-hydrazide**

Pooja Singh<sup>a</sup>, Divya Pratap Singh<sup>a</sup>, Karishma Tiwari<sup>a</sup>, Monika Mishra<sup>a</sup>, Ashish K. Singh<sup>b</sup> and Vinod P. Singh<sup>a\*</sup>

<sup>a</sup>Department of Chemistry, Banaras Hindu University, Varanasi 221005, India

<sup>b</sup>Department of Chemistry, North West University (Mafikeng Campus), Mmabatho 2735, South Africa.

\*E mail: singvp@yahoo.co.in

**Table of Contents**

---

|    |                                                                               |                    |
|----|-------------------------------------------------------------------------------|--------------------|
| 1. | <sup>1</sup> H spectra of Hbpph and [Zn(bpah) <sub>2</sub> ] —————            | S <sub>2-3</sub>   |
| 2. | <sup>13</sup> C spectra of Hbpph and [Zn(bpah) <sub>2</sub> ] —————           | S <sub>4-5</sub>   |
| 3. | $\pi \cdots \pi$ and C-H $\cdots \pi$ interactions in different compounds ——— | S <sub>6-8</sub>   |
| 4. | Orbital diagram showing electronic transitions in Co(II) complex-             | S <sub>9</sub>     |
| 5. | Tables for theoretical structural parameters —————                            | S <sub>10-11</sub> |

---

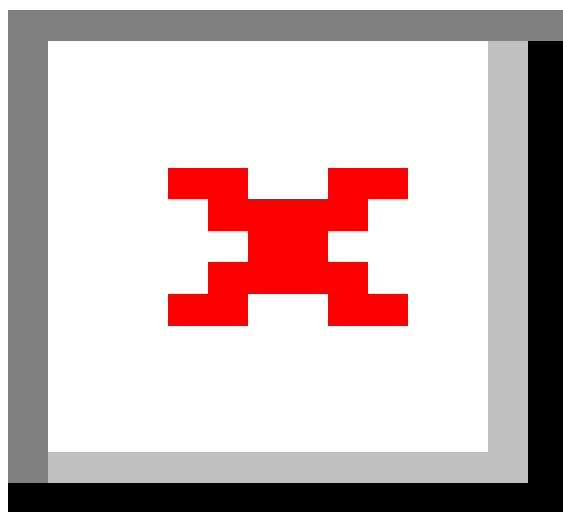

**Fig. S1**  $^1\text{H}$  NMR spectra of Habph in  $\text{DMSO-d}_6$ .

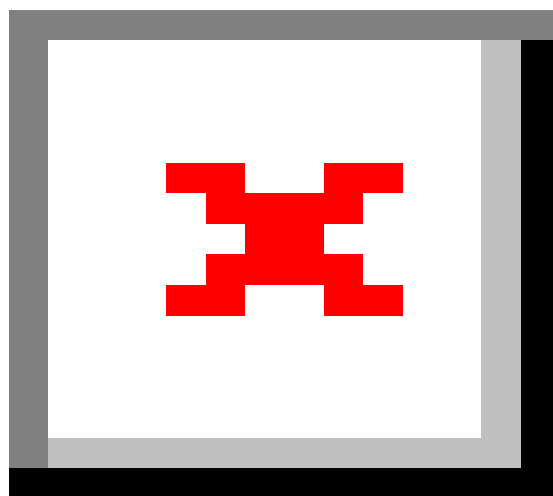

**Fig. S2**  $^1\text{H}$  NMR spectra of  $[\text{Zn}(\text{abph})_2]$  in  $\text{DMSO-d}_6$ .

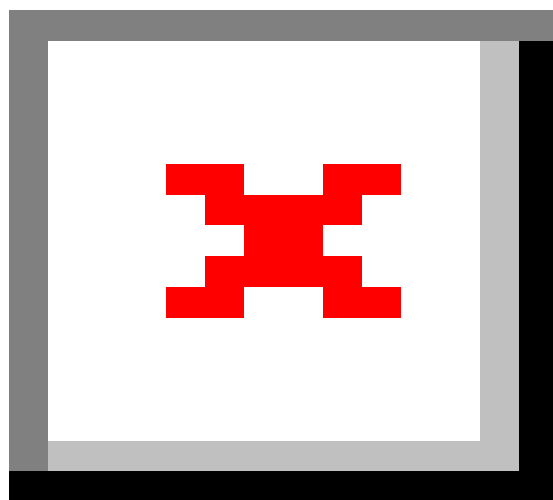

**Fig. S3**  $^{13}\text{C}$  NMR spectra of Habph in DMSO- $\text{d}_6$ .

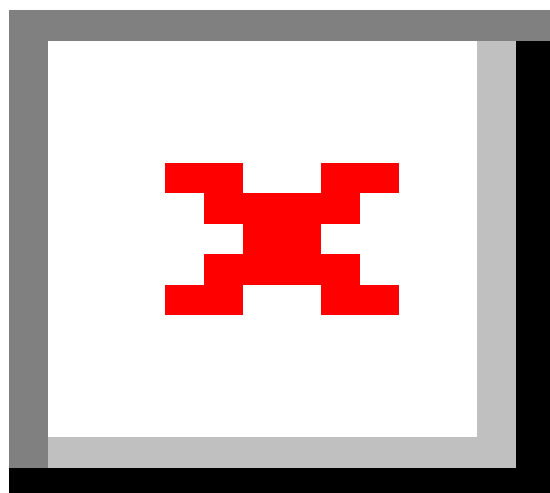

**Fig. S4**  $^{13}\text{C}$  NMR spectra of  $[\text{Zn}(\text{abph})_2]$  in  $\text{DMSO-d}_6$ .

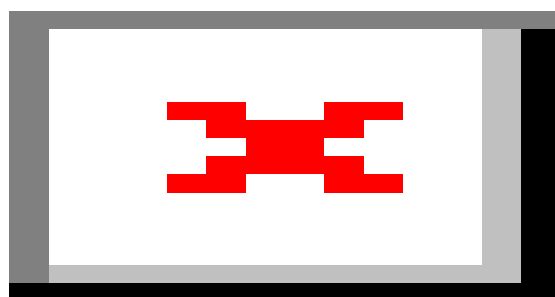

**Fig. S5** Various types of C-H $\cdots\pi$  interactions in Habph.

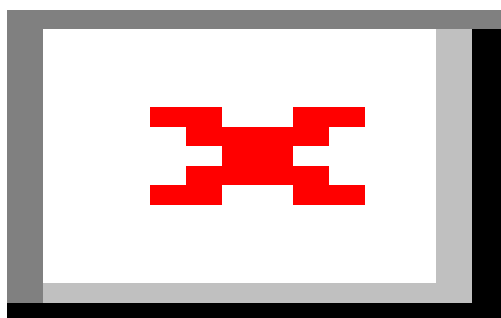

**Fig. S6** Various types of  $\pi\cdots\pi$  and C-H $\cdots\pi$  interactions in [Mn(abph)<sub>2</sub>].

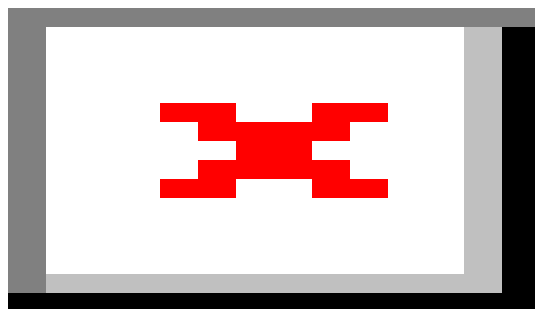

**Fig. S7** Various types of  $\pi\cdots\pi$  and C-H $\cdots\pi$  interactions in [Ni(abph)<sub>2</sub>].

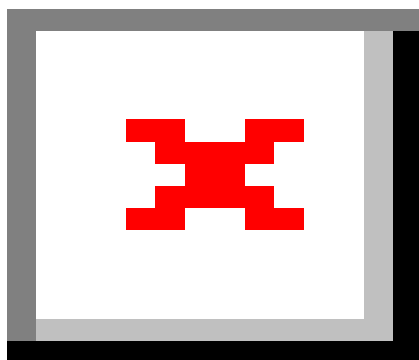

**Fig. S8** Various types of  $\pi\cdots\pi$  and C-H $\cdots\pi$  interactions in [Cu(abph)<sub>2</sub>].

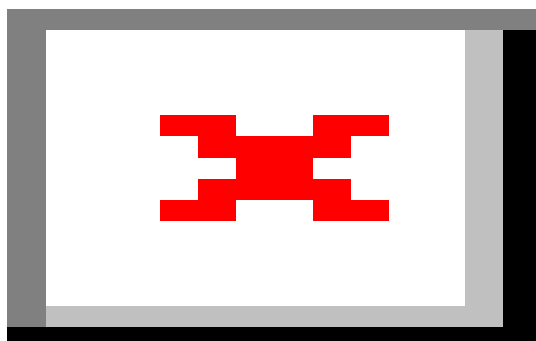

**Fig. S9** Various types of  $\pi\cdots\pi$  and C-H $\cdots\pi$  interactions in [Zn(abph)<sub>2</sub>]. 2H<sub>2</sub>O.



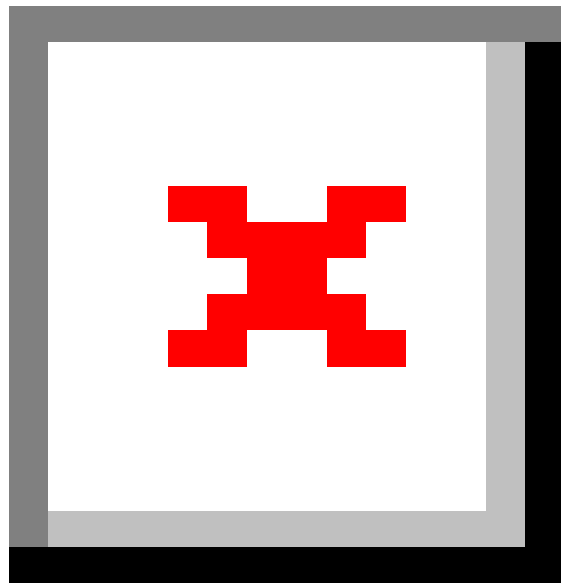

| Bond length (Å) |       | Bond angles (°) |       |
|-----------------|-------|-----------------|-------|
| Co–N(1)         | 2.199 | O(2)–Co–N(6)    | 74.6  |
| Co–N(2)         | 2.097 | N(6)–Co–N(5)    | 74.9  |
| Co–O(1)         | 2.084 | N(5)–Co–O(1)    | 89.2  |
| Co–N(5)         | 2.193 | N(2)–Co–O(1)    | 74.5  |
| Co–N(6)         | 2.097 | O(2)–Co–O(1)    | 107.2 |
| Co–O(2)         | 2.088 | N(2)–Co–N(1)    | 89.5  |
| N(2)–C(6)       | 1.364 | N(5)–Co–N(5)    | 75.0  |
| N(3)–C(13)      | 1.308 |                 |       |
| C(25)–N(6)      | 1.364 |                 |       |
| C(32)–N(7)      | 1.308 |                 |       |
| C(13)–O(1)      | 1,274 |                 |       |

**Fig. S10.** Orbital diagram showing electronic transitions in Co(II) complex.

**Table S1** Selected bond lengths and angles calculated by UB3LYP method for Co(II) complex.

**Table S2** Comparison of experimental and theoretical vibrational frequencies of Co(II) complex.**Table S3** TDDFT calculations for UV-Vis transitions and their assignments.

| S.N. | UV (Exp.)<br>$\lambda_{\max}$ (nm)          | UV (Calc.)<br>$\lambda_{\max}$ (nm)       | Transition                                    | Assignments                                                                                              |
|------|---------------------------------------------|-------------------------------------------|-----------------------------------------------|----------------------------------------------------------------------------------------------------------|
| 1    | -                                           | 1304                                      | HOMO-1 → LUMO+1 ( $\beta$ )<br>0.28           | $d_{xy}, d_{yz}, d_{xz}$ to $d_{x^2-y^2}, d_z^2$                                                         |
| 2    | 659                                         | 663                                       | HOMO( $\alpha$ ) → LUMO+2 ( $\beta$ )<br>0.51 | $\pi$ (Ligand), $d_{xy}, d_{yz}, d_{xz}$ to $d_{x^2-y^2}, \pi$ of C=N,<br>$\pi$ (Ligand)                 |
| 3    | 492                                         | 492                                       | HOMO-1 → LUMO ( $\alpha$ )<br>0.54            | $\pi$ (Ligand) to $d_{x^2-y^2}$                                                                          |
|      |                                             |                                           | HOMO → LUMO+1 ( $\alpha$ )<br>0.74            | $\pi$ (Ligand), $d_{xy}, d_{yz}, d_{xz}$ to $d_{x^2-y^2}, \pi$ (Ligand)                                  |
|      | Experimental values<br>( $\text{cm}^{-1}$ ) | Calculated values<br>( $\text{cm}^{-1}$ ) | Intensity<br>(calculated)                     | Band assignments                                                                                         |
|      | 3449s, 3386s                                | 3433, 3372                                | 0.57 50.501                                   | $d_{x^2-y^2}, \pi$ of C=N, $\pi$ (Ligand)<br>$\nu(\text{NH}_2)$                                          |
| 4    | 1581m                                       | 400 1567                                  | HOMO-2 → LUMO+1 ( $\beta$ )<br>0.37 64.247    | $\pi$ (Ligand) to $d_z^2, d_{x^2-y^2}$<br>$\nu(\text{C=N})$                                              |
| 5    | 1609m<br>1337m                              | 390 1616<br>1315                          | HOMO-4 → LUMO+1 ( $\beta$ )<br>0.85 400.636   | $\nu(\text{N=C-O})$<br>$\pi$ (Ligand) to, $\pi$ (Ligand)<br>$\nu(\text{C-O})$                            |
| 6    | 1028w<br>469m                               | 374 1013<br>460                           | HOMO-4 → LUMO+2 ( $\beta$ )<br>0.87 61.883    | $\nu(\text{N-N})$<br>$\pi$ (Ligand) to $d_{x^2-y^2}, \pi$ of<br>C=N, $\pi$ (Ligand)<br>$\nu(\text{M-O})$ |
